# Supplementary material for: The Analysis of Platelet-Derived circRNA Repertoire as Potential Diagnostic Biomarker for Non-Small Cell Lung Cancer
Source: MDPI journal article supplement (doi:10.3390/cancers13184644), 2021-09-16
Supplement: s1 [file s1]

# Supplementary Materials: The Analysis of Platelet-Derived circRNA Repertoire as Potential Diagnostic Biomarker for Non-Small Cell Lung Cancer

Silvia D'Ambrosi, Allerdien Visser, Mafalda Antunes-Ferreira, Ankie Poutsma, Stavros Giannoukakos, Nik Sol, Siamack Sabrkhany, Idris Bahce, Marijke J.E. Kuijpers, Mirjam G.A. Oude Egbrink, Arjan W. Griffioen, Myron G. Best, Danijela Koppers-Lalic, Cees Oudejans, and Thomas Würdinger

(a)

| Sample   | Type    | Gender | Age | Stage | Hospital location # |
|----------|---------|--------|-----|-------|---------------------|
| Control1 | control | F      | 67  | 0     | 1                   |
| Control2 | control | M      | 80  | 0     | 1                   |
| Control3 | control | F      | 63  | 0     | 1                   |
| Control4 | control | F      | 63  | 0     | 2                   |
| Control5 | control | F      | 63  | 0     | 2                   |
| Control6 | control | M      | 72  | 0     | 2                   |
| NSCLC1   | cancer  | M      | 69  | IV    | 2                   |
| NSCLC2   | cancer  | F      | 56  | IV    | 2                   |
| NSCLC3   | cancer  | F      | 62  | IV    | 2                   |
| NSCLC4   | cancer  | F      | 67  | III   | 1                   |
| NSCLC5   | cancer  | F      | 62  | IV    | 1                   |
| NSCLC6   | cancer  | M      | 80  | II    | 1                   |

(b)

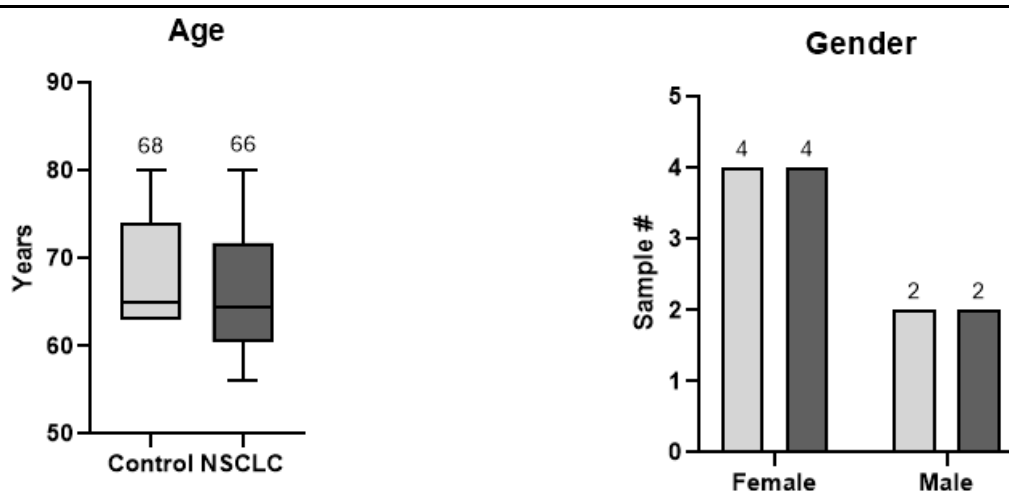

**Supplementary Figure S1.** Sample information of the platelet reference cohort used for circRNA analysis by RNA-se- quencing. (a) Table with the general information on samples used in the study. Columns: Samples names; Type: Control refers to platelets samples derived from asymptomatic individuals and Cancer refers to samples derived from NSCLC patients; Gender: female (F) and male (M); Age: years; Stage: tumor stage at the time of the blood withdrawal; and Hospital location #: blood samples were windrowed in two different hospitals: Maastricht University Medical Center (1) and VU University Medical Center, Amsterdam (2). (b) Control and NSCLC group were balanced per age and gender. Average age per group and the number of samples per gender are indicate above graphic bars.

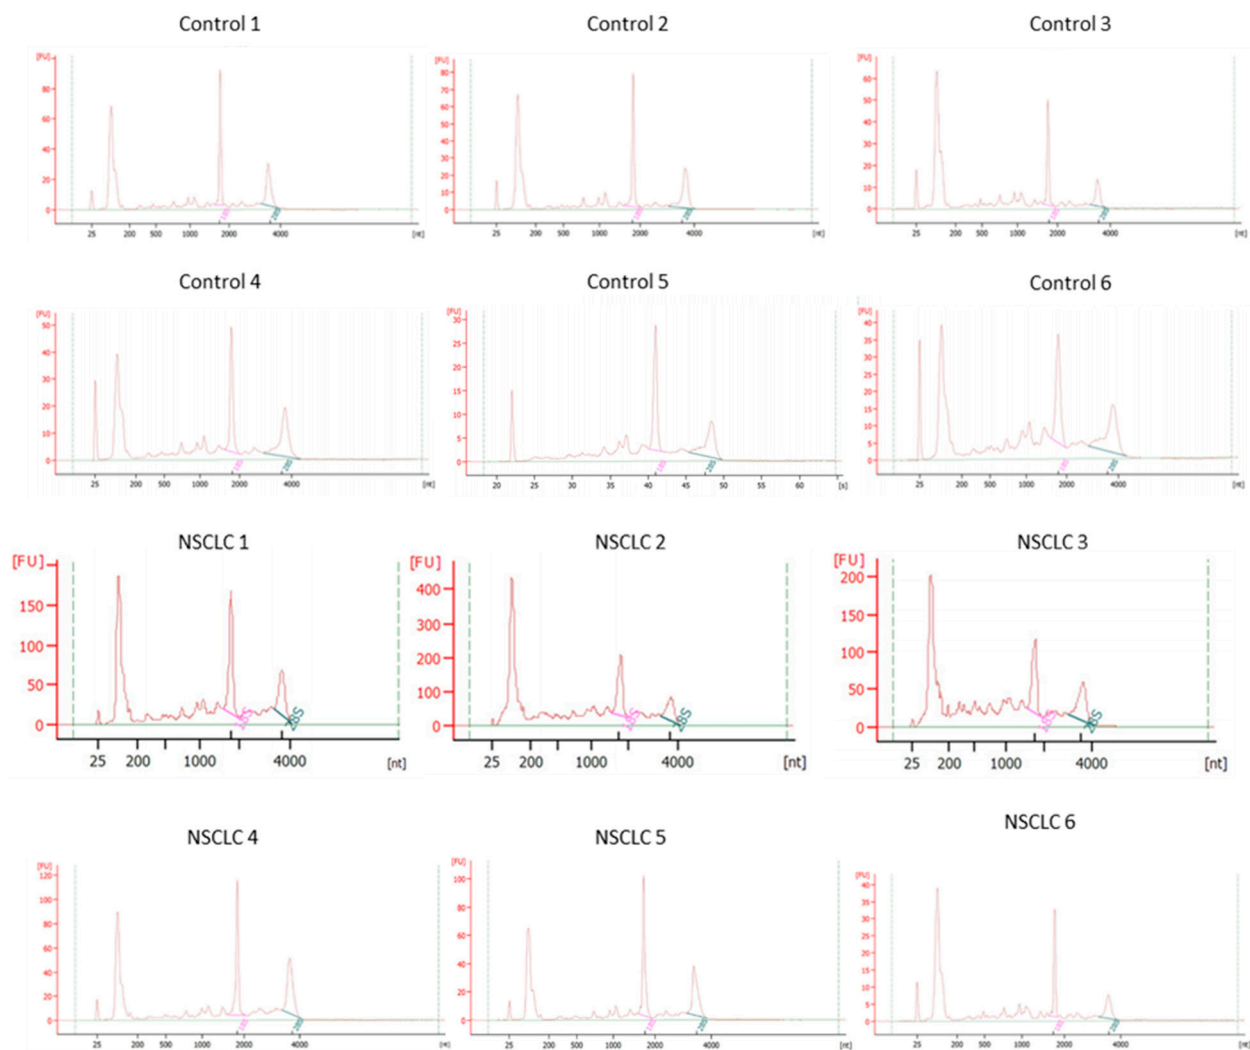

**Supplementary Figure S2.** Overview of Bioanalyzer profiles of RNA extracted from platelets. Quality control and quantification of the total RNA derived from platelets by Agilent Bioanalyzer Picochip analysis. Images are representative for other Bioanalyzer results.

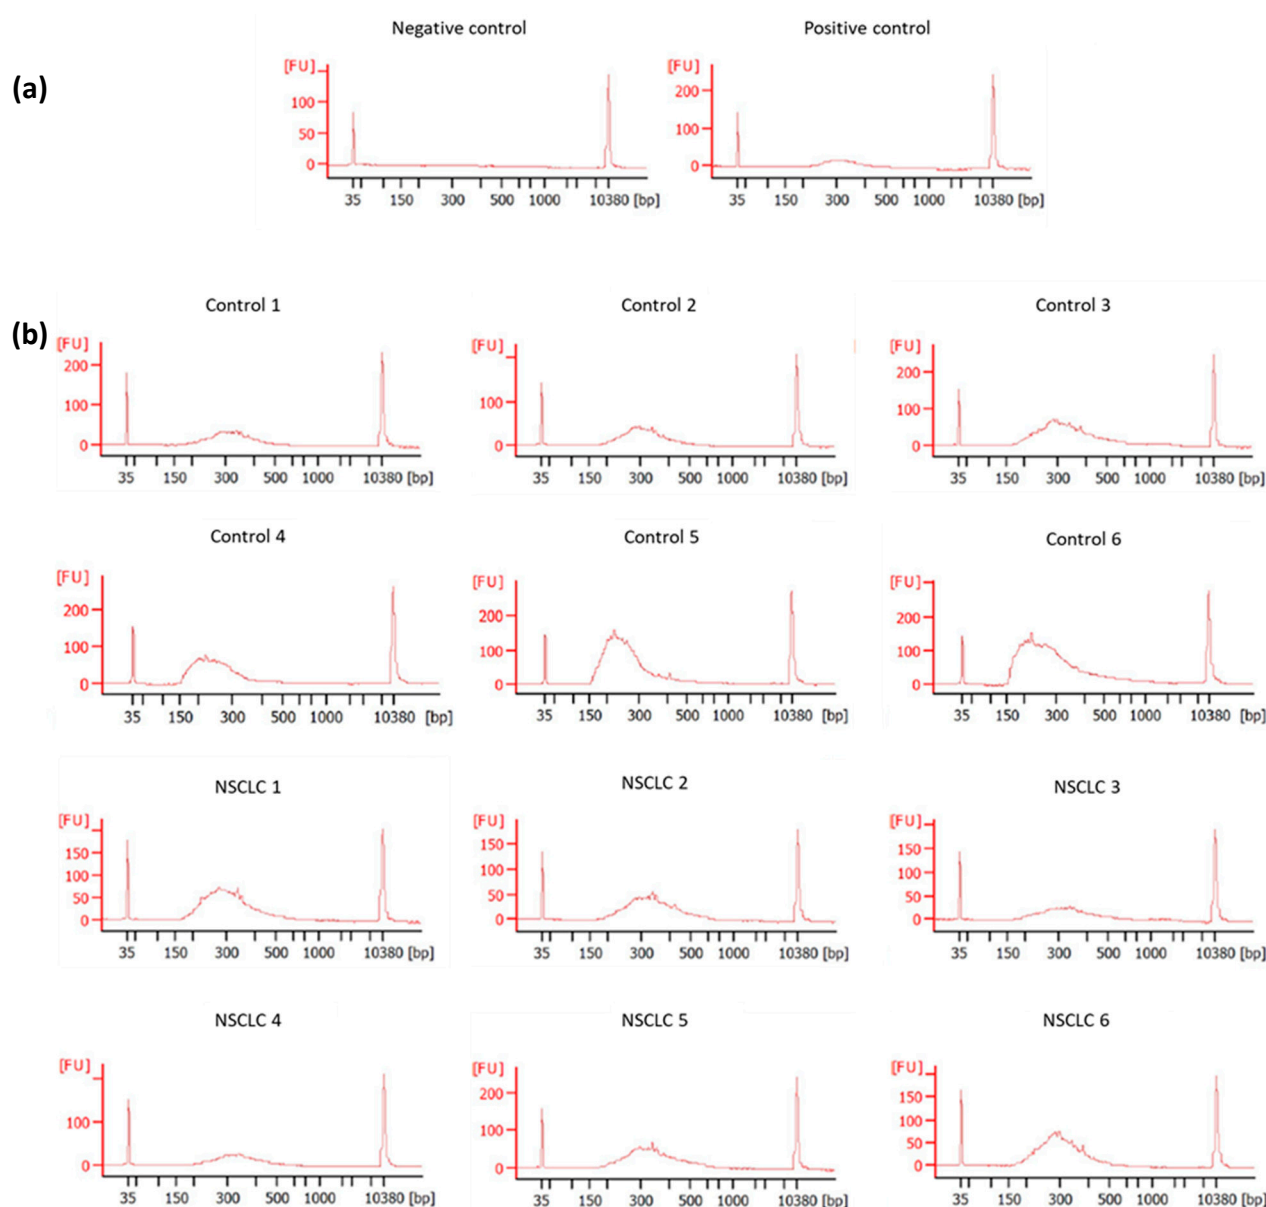

**Supplementary Figure S3.** Bioanalyzer profiles of the cDNA libraries. Platelets RNA-sequencing libraries analysis by Agilent Bioanalyzer DNA 7500. (a) Negative and positive controls subjected to SMARTer cDNA amplification and library preparation. The negative control should show no signal. Positive control should show a signal in the region between 150 bp and 750 bp. (b) Bioanalyzer profiles of the 12 platelets samples used for the RNA-sequencing experiment.

(a)

| Sample | Type    | Gender | Age | Stage | Hospital location # | Histological type | Smoking |
|--------|---------|--------|-----|-------|---------------------|-------------------|---------|
| CNTR1  | control | M      | 58  | 0     | 1                   | N/A               | 0       |
| CNTR2  | control | F      | 64  | 0     | 1                   | N/A               | 0       |
| CNTR3  | control | M      | 56  | 0     | 1                   | N/A               | 1       |
| CNTR4  | control | F      | 52  | 0     | 1                   | N/A               | 2       |
| CNTR5  | control | M      | 60  | 0     | 1                   | N/A               | 1       |
| CNTR6  | control | F      | 52  | 0     | 1                   | N/A               | 0       |
| CNTR7  | control | F      | 65  | 0     | 1                   | N/A               | 0       |
| CNTR8  | control | F      | 59  | 0     | 1                   | N/A               | 1       |

|           |         |   |    |      |   |     |      |
|-----------|---------|---|----|------|---|-----|------|
| CNTR9     | control | M | 52 | 0    | 1 | N/A | 1    |
| CNTR10    | control | M | 64 | 0    | 1 | N/A | 0    |
| CNTR11    | control | F | 61 | 0    | 1 | N/A | 0    |
| CNTR12    | control | F | 56 | 0    | 1 | N/A | 0    |
| CNTR13    | control | F | 66 | 0    | 1 | N/A | 0    |
| CNTR14    | control | M | 53 | 0    | 1 | N/A | 0    |
| CNTR15    | control | M | 61 | 0    | 1 | N/A | N.A. |
| CNTR16    | control | F | 64 | 0    | 1 | N/A | 0    |
| CNTR17    | control | F | 68 | 0    | 1 | N/A | 2    |
| CNTR18    | control | M | 65 | 0    | 1 | N/A | 1    |
| CNTR19    | control | M | 60 | 0    | 1 | N/A | 2    |
| CNTR20    | control | M | 73 | 0    | 1 | N/A | 2    |
| CNTR21    | control | M | 79 | 0    | 1 | N/A | 2    |
| CNTR22    | control | M | 68 | 0    | 1 | N/A | 2    |
| CNTR23    | control | M | 79 | 0    | 1 | N/A | 0    |
| CNTR24    | control | M | 75 | 0    | 1 | N/A | 2    |
|           |         |   |    |      |   |     |      |
| NSCLC_P1  | cancer  | F | 72 | IV   | 2 | A   | 1    |
| NSCLC_P2  | cancer  | M | 46 | IV   | 2 | A   | 1    |
| NSCLC_P3  | cancer  | M | 57 | IV   | 2 | A   | 1    |
| NSCLC_P4  | cancer  | M | 54 | IIa  | 1 | S   | 1    |
| NSCLC_P5  | cancer  | M | 68 | Ib   | 1 | A   | 1    |
| NSCLC_P6  | cancer  | F | 53 | Ia   | 1 | A   | 2    |
| NSCLC_P7  | cancer  | F | 65 | Ia   | 1 | A   | 2    |
| NSCLC_P8  | cancer  | F | 59 | Ia   | 1 | O   | 2    |
| NSCLC_P9  | cancer  | F | 70 | Ia   | 1 | O   | 1    |
| NSCLC_P10 | cancer  | M | 60 | IIIa | 1 | S   | 2    |
| NSCLC_P11 | cancer  | M | 67 | IIIa | 1 | O   | 1    |
| NSCLC_P12 | cancer  | F | 52 | Ib   | 1 | A   | 0    |
| NSCLC_P13 | cancer  | M | 60 | Ib   | 1 | S   | 2    |
| NSCLC_P14 | cancer  | M | 78 | IIIa | 1 | S   | 0    |
| NSCLC_P15 | cancer  | M | 71 | IV   | 2 | O   | 1    |
| NSCLC_P16 | cancer  | F | 41 | IV   | 2 | A   | 0    |
| NSCLC_P17 | cancer  | F | 44 | IV   | 2 | O   | 2    |
| NSCLC_P18 | cancer  | M | 63 | IV   | 2 | A   | 0    |
| NSCLC_P19 | cancer  | M | 67 | IV   | 2 | S   | 0    |
| NSCLC_P20 | cancer  | M | 55 | IV   | 2 | A   | 1    |
| NSCLC_P21 | cancer  | F | 77 | IV   | 2 | O   | N.A. |
| NSCLC_P22 | cancer  | M | 45 | IV   | 2 | O   | 1    |
| NSCLC_P23 | cancer  | M | 61 | IV   | 2 | S   | 2    |

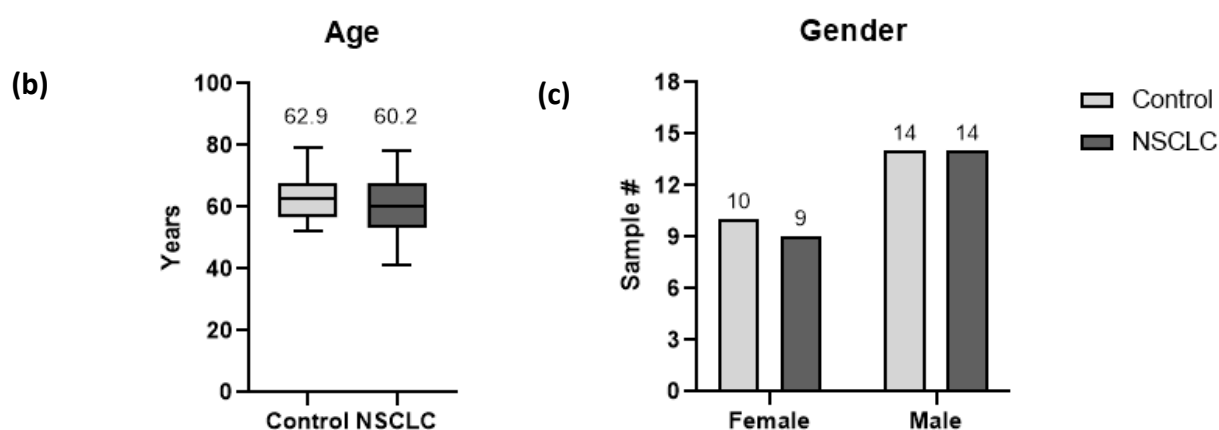

**Supplementary Figure S4.** Validation sample information of the platelet reference cohort used for circRNA analysis by RT-qPCR. (a) Table with the general information on the samples from the validation cohort. Columns: Samples ID; Samples names; Type: Control refers to platelets samples derived from asymptomatic individuals and Cancer refers to samples derived from NSCLC patients; Gender: female (F) and male (M); Age: years; Stage: tumor stage at the time of the blood withdrawal; Hospital location #: blood samples were collected in two different hospitals: Maastricht University Medical Center (1) and VU University Medical Center, Amsterdam; Histological type are divided in: (A) adenocarcinoma, (S) squamous cell carcinoma, (O) other histological types or histological data not available, and (N/A) not applicable; Smoking: (0) no smoker, (1) smoker, (2) formal smoker and (N.A.) data not available. Control and NSCLC group were balanced per age (b) and gender (c).

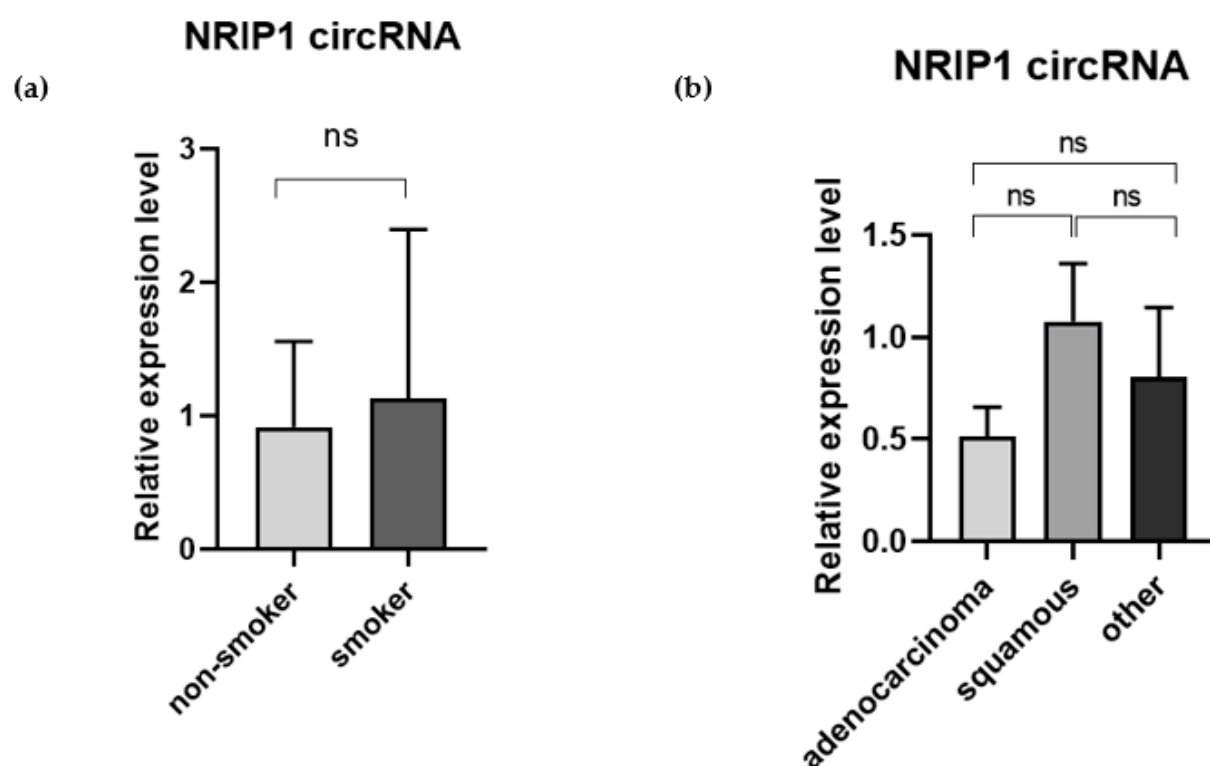

**Supplementary Figure S5.** circNRIP1 expression in platelet-derived RNA by RT-qPCR evaluated by histological type and smoking habits. The expression of circRNA NRIP1 and MAN1A2 were analyzed by RT-qPCR. The  $2^{-\Delta\Delta Ct}$  method was used to calculate the relative expression of circNRIP1 between the different groups. For the statistical analysis we used the unpaired nonparametric t-test with Welch correction with 2-tailed P-value. (a) Samples are divided in (formal) smokers ( $n=28$ ) and non-smokers ( $n=17$ ). No significant difference (indicated as ns) was observed on the expression of circNRIP1

( $p$ -value=0.4674). (b) Platelet samples derived from NSCLC patients were divided in three histological subtypes: patients diagnosed with adenocarcinoma (adenocarcinoma,  $n=10$ ); patients diagnosed with squamous cell carcinoma (squamous,  $n=6$ ); patients with other histological variants or no histological data available (other,  $n=7$ ). The expression level of circNRIP1 shows no significant differences (indicate as ns) between adenocarcinoma and squamous group ( $p$ -value=0.1164), between adenocarcinoma and others subtypes ( $p$ -value=0.4497) and between squamous cell carcinoma and other subtypes ( $p$ -value=0.5535).

**Supplementary Table S1.** Summary table of the primer design. The chromosomal region corresponds to the back splicing junctions of circRNA NRIP1 (target of interest) and circRNA MAN1A2 (control “housekeeping” circRNA). Primers were designed to amplify the back splicing region of the two circRNAs. Probes were labeled with 5'-6FAM and 3'-DQ.

|                                      | circNRIP1                                        | circMAN1A2               |
|--------------------------------------|--------------------------------------------------|--------------------------|
| <b>Back-splicing junction (hg38)</b> | chr21:15014344-15043574                          | chr1:117402186-117420649 |
| <b>Forward primer (5'-3')</b>        | TGAAGGAG-                                        | CGATTTATTGGAGGCCTACTTGC  |
| <b>Reverse primer (5'-3')</b>        | GACAGGGAATCTGAA                                  | TCTGGGTCTCCACCACGTAT     |
| <b>Probe (6-FAM + DQ)</b>            | GGCTGTGTTTCTCCCAAATGTT                           | GCCACCAGTCCCTATTCCCAAC-  |
| <b>Concentrations</b>                | AGAGGCTCAGAGCTTGGAGA-<br>CAGAC<br>600/300/250 nM | CTTGT<br>300/600/250 nM  |

**Supplementary Table S2.** ANOVA output of the top 30 circRNAs (out of 411) differentially expressed in platelets of NSCLC patients ( $n=6$ ) versus platelets of asymptomatic individuals ( $n=6$ ), ordered by increasing  $p$ -value. The origin of the circRNAs is provided by chromosome number followed by position of back-splice junctions (GRCh38/hg38), positive (+) or negative (−) strand and size of genomic region. LogFC: logarithm of fold change, logCPM: logarithm of counts per million, LR: likelihood ratio,  $p$ -value: probability value, FDR:  $p$ -value corrected for false-detection rate.

| circRNA | Chr_position              | logFC    | logCPM   | LR       | P-value  | FDR                  |
|---------|---------------------------|----------|----------|----------|----------|----------------------|
| NRIP1   | chr21:15043574-15014344   | -0.29592 | 16.15014 | 38.16888 | 6.49E-10 | 3.07×10 <sup>6</sup> |
| RNF19B  | chr1:32949774-32948222    | -5.00585 | 6.827754 | 12.68557 | 0.000368 | 0.408548             |
| AMD1    | chr6:110887505-110888983  | -5.26108 | 6.960953 | 12.52172 | 0.000402 | 0.408548             |
| SH3BGRL | chrX:81276984-81298357    | -4.59651 | 7.231869 | 12.43663 | 0.000421 | 0.408548             |
| ST7L    | chr1:112616895-112597971  | -4.63557 | 7.255242 | 12.26218 | 0.000462 | 0.408548             |
| SUV39H2 | chr10:14896846-14897517   | -4.09755 | 7.631399 | 11.59124 | 0.000663 | 0.408548             |
| RBM33   | chr7:155706860-155718443  | -4.1555  | 7.411723 | 10.87308 | 0.000976 | 0.408548             |
| NO-NAME | chr2:190568073-190573419  | -5.45329 | 7.070343 | 10.8723  | 0.000976 | 0.408548             |
| KRIT1   | chr7:92234923-92225720    | -4.70355 | 6.682802 | 10.74499 | 0.001046 | 0.408548             |
| PECAM1  | chr17:64352463-64348260   | -4.53681 | 6.602994 | 10.67477 | 0.001086 | 0.408548             |
| AFF1    | chr4:87084120-87091829    | -4.61285 | 7.239943 | 10.59121 | 0.001136 | 0.408548             |
| KIF2A   | chr5:62347130-62355254    | -2.86466 | 8.606843 | 10.35752 | 0.001289 | 0.408548             |
| LINS1   | chr15:100565265-100564692 | -2.2521  | 10.04339 | 10.33537 | 0.001305 | 0.408548             |
| PPA2    | chr4:105424322-105396249  | -3.87751 | 7.618442 | 10.28956 | 0.001338 | 0.408548             |
| DENND4A | chr15:65706224-65702305   | -4.15537 | 6.457191 | 10.08241 | 0.001497 | 0.408548             |
| DLG1    | chr3:197119530-197104903  | 4.554137 | 7.56337  | 9.842434 | 0.001705 | 0.408548             |
| MYCBP2  | chr13:77233263-77224451   | -5.2288  | 6.944568 | 9.837442 | 0.00171  | 0.408548             |
| RHOF    | chr12:121781192-121780872 | -1.68676 | 9.327772 | 9.774111 | 0.00177  | 0.408548             |
| HTT     | chr4:3086939-3107423      | -5.1264  | 6.8903   | 9.564129 | 0.001984 | 0.408548             |
| STXBP3  | chr1:108752257-108760085  | -5.0624  | 6.856096 | 9.42589  | 0.002139 | 0.408548             |
| SUZ12   | chr17:31988320-31988497   | -3.52316 | 7.955087 | 9.353843 | 0.002225 | 0.408548             |
| UBAP2   | chr9:33973237-33971651    | -4.1397  | 7.408808 | 8.983093 | 0.002725 | 0.408548             |
| NCOR1   | chr17:16158873-16149451   | -4.80201 | 6.730626 | 8.874144 | 0.002892 | 0.408548             |

---

|        |                         |          |          |          |          |          |
|--------|-------------------------|----------|----------|----------|----------|----------|
| BRWD1  | chr21:39274472-39269899 | -3.19201 | 8.11097  | 8.806127 | 0.003002 | 0.408548 |
| XRN2   | chr20:21339044-21344208 | -4.056   | 6.926366 | 8.801219 | 0.00301  | 0.408548 |
| DCAF12 | chr9:34098517-34096716  | -3.76483 | 7.504243 | 8.705537 | 0.003172 | 0.408548 |
| USP32  | chr17:60294801-60265412 | -4.32634 | 7.070119 | 8.66162  | 0.00325  | 0.408548 |
| FANCL  | chr2:58232112-58198579  | -4.63002 | 6.650712 | 8.584887 | 0.00339  | 0.408548 |
| PRR5L  | chr11:36393846-36403378 | 2.698679 | 8.433516 | 8.562247 | 0.003432 | 0.408548 |
| VAC14  | chr16:70763025-70762540 | -4.1447  | 6.97075  | 8.553315 | 0.003449 | 0.408548 |

---
